# Supplementary material for: Characterization of the fecal microbiome in cats with inflammatory bowel disease or alimentary small cell lymphoma
Source: PubMed Central journal article supplement (PMC6914782; doi:10.1038/s41598-019-55691-w), 2019-12-16
Supplement: 41598_2019_55691_MOESM1_ESM.pdf [file 41598_2019_55691_MOESM1_ESM.pdf]

Characterization of the fecal microbiome in cats with inflammatory bowel disease or alimentary small cell lymphoma

S Marsilio<sup>1, 2\*</sup>, R Pilla<sup>1</sup>, B Sarawichitr<sup>1</sup>, B Chow<sup>3</sup>, S Hill<sup>3</sup>, MR Ackermann<sup>4</sup>, JS Estep<sup>5</sup>, JA Lidbury<sup>1</sup>, JM Steiner<sup>1</sup>, JS Suchodolski<sup>1</sup>

1. Gastrointestinal Laboratory, Department of Small Animal Clinical Science, Texas A&M University, 4474 TAMU, College Station, TX 77843-4474, USA 2. University of California Davis School of Veterinary Medicine and Epidemiology, Davis, CA 95616, USA 3. Veterinary Specialty Hospital, 10435 Sorrento Valley Rd, San Diego, CA 92121, USA, 4. Oregon Veterinary Diagnostic Laboratory, Carlson College of Veterinary Medicine, Oregon State University, Corvallis, OR. 5. Texas Veterinary Pathology, LLC., San Antonio, TX

Dr. B Chow's current affiliation is the VCA Animal Specialty & Emergency Center 1535 S Sepulveda Blvd, Los Angeles, CA 90025. Dr. S Hill's current affiliation is Ethos Diagnostic Science by Ethos Veterinary Health, 10455 Sorrento Valley Road Suite 100 San Diego, CA 92121.

\*corresponding author: SMarsilio@ucdavis.edu

| Index           | Healthy           |                  | FCE     |                 | subgroup FCE-<br>IBD | subgroup FCE -<br>SCL | Kruskal Wallis<br>ANOVA p value | Dunn's post hoc p value |        |       |
|-----------------|-------------------|------------------|---------|-----------------|----------------------|-----------------------|---------------------------------|-------------------------|--------|-------|
|                 | median (range)    | median (range)   | p value | median (range)  |                      |                       |                                 | median (range)          | H/IBD  | H/SCL |
| <b>OTUs</b>     | 253.5 (167 – 359) | 232 (98 – 359)   | 0.003   | 232 (119 – 359) | 228 (98 – 265)       | 0.015                 | 0.120                           | 0.035                   | >0.999 |       |
| <b>Shannon</b>  | 7.3 (6.5 – 8.0)   | 7.0 (5.1 – 7.5)  | 0.008   | 7.0 (5.5 – 7.5) | 7.0 (5.1 – 7.5)      | 0.030                 | 0.100                           | 0.112                   | >0.999 |       |
| <b>Faith PD</b> | 9.5 (6.9 – 11.8)  | 8.7 (5.6 – 10.7) | 0.019   | 9.0 (6.1 – 9.6) | 8.3 (5.6 – 10.7)     | 0.049                 | 0.500                           | 0.061                   | >0.999 |       |

**Supplementary Table 1.** Summary of alpha diversity indices at a depth of 43,660 sequences per sample comparing healthy cats and cats with CE (FCE) with subgroups inflammatory bowel disease (IBD) and small cell lymphoma (SCL).

Abbreviations: FCE Feline chronic enteropathy, OTUs observed operational taxonomic units, STD Standard deviation, PD Phylogenetic Index, H Healthy cats

| Bacterial Group                           | Healthy |          | IBD    |          | SCL    |          | Healthy vs IBD vs SCL <sup>1</sup> |          | Healthy vs IBD <sup>2</sup> |        | Healthy vs SCL <sup>2</sup> |          | IBD vs SCL <sup>2</sup> |        |
|-------------------------------------------|---------|----------|--------|----------|--------|----------|------------------------------------|----------|-----------------------------|--------|-----------------------------|----------|-------------------------|--------|
|                                           | Median  | Range    | Median | Range    | Median | Range    | Pvalue                             | Qvalue   | Pvalue                      | Qvalue | Pvalue                      | Qvalue   | Pvalue                  | Qvalue |
| <b>Class</b>                              |         |          |        |          |        |          |                                    |          |                             |        |                             |          |                         |        |
| Actinobacteria                            | 1.2     | 0-36.8   | 0.4    | 0.2-38.9 | 0.2    | 0.1-18.4 | 0.0336                             | 0.359975 | 0.9999                      | 0.9999 | 0.0281                      | 0.3091   | 0.2787                  | 0.9999 |
| Gammaproteobacteria                       | 0.7     | 0-32.6   | 0.5    | 0-39.5   | 1.8    | 0.2-37.8 | 0.0727                             | 0.359975 | 0.9999                      | 0.9999 | 0.1007                      | 0.55385  | 0.1545                  | 0.9999 |
| <b>Order</b>                              |         |          |        |          |        |          |                                    |          |                             |        |                             |          |                         |        |
| Bifidobacteriales                         | 1.2     | 0-36.8   | 0.4    | 0.2-38.9 | 0.2    | 0.1-18.4 | 0.0297                             | 0.19305  | 0.9999                      | 0.9999 | 0.024                       | 0.156    | 0.3609                  | 0.9999 |
| Turicibacterales                          | 0       | 0-23.7   | 0      | 0-5.8    | 0      | 0-0.1    | 0.0738                             | 0.3198   | 0.7844                      | 0.9999 | 0.0808                      | 0.350133 | 0.9999                  | 0.9999 |
| Enterobacteriales                         | 0.1     | 0-32.6   | 0.2    | 0-39.4   | 1      | 0-37.8   | 0.0187                             | 0.19305  | 0.5643                      | 0.9999 | 0.0177                      | 0.156    | 0.7669                  | 0.9999 |
| <b>Family</b>                             |         |          |        |          |        |          |                                    |          |                             |        |                             |          |                         |        |
| Bifidobacteriaceae                        | 1.2     | 0-36.8   | 0.4    | 0.2-38.9 | 0.2    | 0.1-18.4 | 0.0297                             | 0.16632  | 0.9999                      | 0.9999 | 0.024                       | 0.2366   | 0.3609                  | 0.9999 |
| Prevotellaceae                            | 1.1     | 0-21.7   | 0.6    | 0.2-18.8 | 0.1    | 0-22.5   | 0.0365                             | 0.170333 | 0.9999                      | 0.9999 | 0.0309                      | 0.2366   | 0.2749                  | 0.9999 |
| Odoribacteraceae                          | 0       | 0-2.8    | 0      | 0-1.3    | 0.8    | 0-1.4    | 0.0093                             | 0.1302   | 0.9999                      | 0.9999 | 0.0091                      | 0.2366   | 0.0545                  | 0.9999 |
| Paraprevotellaceae                        | 0       | 0-18.5   | 0      | 0-0.3    | 0      | 0-5.6    | 0.0092                             | 0.1302   | 0.061                       | 0.4928 | 0.0338                      | 0.2366   | 0.9999                  | 0.9999 |
| Streptococcaceae                          | 0       | 0-4.1    | 0.1    | 0-4.3    | 0.1    | 0-61.4   | 0.0221                             | 0.1547   | 0.0704                      | 0.4928 | 0.103                       | 0.480667 | 0.9999                  | 0.9999 |
| Ruminococcaceae                           | 8       | 1.2-18.4 | 5.8    | 0.3-9.8  | 5.6    | 0.2-17.3 | 0.0532                             | 0.19425  | 0.0647                      | 0.4928 | 0.5395                      | 0.9999   | 0.9999                  | 0.9999 |
| Enterobacteriaceae                        | 0.1     | 0-32.6   | 0.2    | 0-39.4   | 1      | 0-37.8   | 0.0187                             | 0.1547   | 0.7382                      | 0.9999 | 0.495                       | 0.9999   | 0.9999                  | 0.9999 |
| <b>Genus</b>                              |         |          |        |          |        |          |                                    |          |                             |        |                             |          |                         |        |
| Bifidobacterium                           | 1.2     | 0-36.8   | 0.4    | 0.2-38.9 | 0.2    | 0.1-18.4 | 0.0297                             | 0.2376   | 0.9999                      | 0.9999 | 0.024                       | 0.4944   | 0.3609                  | 0.9999 |
| Undetermined genus, Coriobacteriaceae     | 0.1     | 0-16.4   | 0.4    | 0-11.3   | 0.1    | 0-7.2    | 0.0258                             | 0.2376   | 0.453                       | 0.9999 | 0.1991                      | 0.735138 | 0.0216                  | 0.9999 |
| Prevotella                                | 1.1     | 0-21.7   | 0.6    | 0.2-18.8 | 0.1    | 0-22.5   | 0.0365                             | 0.250286 | 0.9999                      | 0.9999 | 0.0309                      | 0.4944   | 0.2749                  | 0.9999 |
| Odoribacter                               | 0       | 0-2.8    | 0      | 0-1.3    | 0.3    | 0-1.4    | 0.0513                             | 0.280985 | 0.9999                      | 0.9999 | 0.0472                      | 0.5664   | 0.2684                  | 0.9999 |
| Streptococcus                             | 0       | 0-4.1    | 0.1    | 0-4.3    | 0.1    | 0-61.4   | 0.0145                             | 0.2376   | 0.0538                      | 0.6456 | 0.0727                      | 0.634286 | 0.9999                  | 0.9999 |
| Peptococcus                               | 0.4     | 0-3      | 0.4    | 0-2.8    | 0.3    | 0-2      | 0.9571                             | 0.9571   | 0.9999                      | 0.9999 | 0.9999                      | 0.9999   | 0.9999                  | 0.9999 |
| Undetermined genus, Peptostreptococcaceae | 0.3     | 0-16.6   | 0.1    | 0-1      | 0.1    | 0-5.9    | 0.1208                             | 0.35304  | 0.2844                      | 0.9999 | 0.3327                      | 0.9999   | 0.9999                  | 0.9999 |
| Undetermined genus, Ruminococcaceae       | 0.1     | 0-0.9    | 0      | 0-0.4    | 0      | 0-0.5    | 0.0126                             | 0.2376   | 0.0356                      | 0.6456 | 0.0925                      | 0.634286 | 0.9999                  | 0.9999 |
| Oscillospira                              | 1.1     | 0.1-3.5  | 0.4    | 0-1.5    | 0.9    | 0-2.2    | 0.0245                             | 0.2376   | 0.0212                      | 0.6456 | 0.8161                      | 0.9999   | 0.5258                  | 0.9999 |
| Undetermined genus, Enterobacteriaceae    | 0.1     | 0-32.6   | 0.2    | 0-39.4   | 1      | 0-37.8   | 0.0159                             | 0.2376   | 0.5065                      | 0.9999 | 0.0153                      | 0.4944   | 0.7822                  | 0.9999 |

## Continued Supplementary Table 2

| Bacterial Group                          | Healthy |         | IBD    |          | SCL    |          | Healthy vs IBD vs SCL <sup>1</sup> |          | Healthy vs IBD <sup>2</sup> |          | Healthy vs SCL <sup>2</sup> |          | IBD vs SCL <sup>2</sup> |        |
|------------------------------------------|---------|---------|--------|----------|--------|----------|------------------------------------|----------|-----------------------------|----------|-----------------------------|----------|-------------------------|--------|
|                                          | Median  | Range   | Median | Range    | Median | Range    | Pvalue                             | Qvalue   | Pvalue                      | Qvalue   | Pvalue                      | Qvalue   | Pvalue                  | Qvalue |
| <b>Species</b>                           |         |         |        |          |        |          |                                    |          |                             |          |                             |          |                         |        |
| Undetermined species, Bifidobacterium    | 1.1     | 0-35.2  | 0.4    | 0-38.6   | 0.1    | 0-11.5   | 0.047                              | 0.259253 | 0.249                       | 0.9617   | 0.0632                      | 0.529689 | 0.9999                  | 0.9999 |
| Undetermined species, Coriobacteriaceae  | 0.1     | 0-16.4  | 0.4    | 0-11.3   | 0.1    | 0-7.2    | 0.0258                             | 0.217457 | 0.453                       | 0.9999   | 0.1991                      | 0.734181 | 0.0216                  | 0.9999 |
| Undetermined species, Bacteroides        | 0.1     | 0-2.3   | 0      | 0-0.8    | 0      | 0-0.5    | 0.0093                             | 0.18762  | 0.34                        | 0.9999   | 0.0098                      | 0.45135  | 0.8596                  | 0.9999 |
| Bacteroides plebeius                     | 1.2     | 0-14.5  | 0.1    | 0-10.9   | 0.1    | 0-4.8    | 0.0143                             | 0.18762  | 0.1414                      | 0.641738 | 0.0296                      | 0.464133 | 0.9999                  | 0.9999 |
| Prevotella copri                         | 1.1     | 0-21.7  | 0.6    | 0.2-18.8 | 0.1    | 0-22.5   | 0.0462                             | 0.259253 | 0.9999                      | 0.9999   | 0.0411                      | 0.464133 | 0.2789                  | 0.9999 |
| Undetermined species, Odoribacter        | 0       | 0-2.8   | 0      | 0-1.3    | 0.3    | 0-1.4    | 0.0513                             | 0.259253 | 0.9999                      | 0.9999   | 0.0472                      | 0.464133 | 0.2684                  | 0.9999 |
| Undetermined species, Streptococcus      | 0       | 0-4.1   | 0.1    | 0-4.3    | 0.1    | 0-61.4   | 0.0329                             | 0.242638 | 0.0549                      | 0.6195   | 0.267                       | 0.875167 | 0.9999                  | 0.9999 |
| Undetermined species, Turicibacter       | 0       | 0-23.7  | 0      | 0-5.8    | 0      | 0-0.1    | 0.0738                             | 0.259253 | 0.7844                      | 0.9999   | 0.0808                      | 0.529689 | 0.9999                  | 0.9999 |
| Undetermined species, Clostridiales      | 1       | 0-4.7   | 0.5    | 0-5.1    | 1.3    | 0-5.1    | 0.0555                             | 0.259253 | 0.0486                      | 0.6195   | 0.9999                      | 0.9999   | 0.405                   | 0.9999 |
| Undetermined species, Clostridium        | 0.2     | 0-10.8  | 0.9    | 0.1-4.2  | 0.8    | 0.1-20.3 | 0.0093                             | 0.18762  | 0.0457                      | 0.6195   | 0.0452                      | 0.464133 | 0.9999                  | 0.9999 |
| Undetermined species, Ruminococcaceae    | 0.1     | 0-0.9   | 0      | 0-0.4    | 0      | 0-0.5    | 0.0126                             | 0.18762  | 0.0356                      | 0.6195   | 0.0925                      | 0.54575  | 0.9999                  | 0.9999 |
| Undetermined species, Oscillospira       | 1.1     | 0.1-3.5 | 0.4    | 0-1.5    | 0.9    | 0-2.2    | 0.0245                             | 0.217457 | 0.0212                      | 0.6195   | 0.8161                      | 0.9999   | 0.5258                  | 0.9999 |
| Undetermined species, Enterobacteriaceae | 0.1     | 0-32.6  | 0.2    | 0-39.4   | 1      | 0-37.8   | 0.0159                             | 0.18762  | 0.5065                      | 0.9999   | 0.0153                      | 0.45135  | 0.7822                  | 0.9999 |

**Supplementary Table 2.** Taxa found to be significantly different (p value) between healthy cats, cats with inflammatory bowel disease (IBD), and cats small cell lymphoma (SCL) before correction for false discovery (q value). Numbers represent relative percentages. Legend: <sup>1</sup> Kruskal Wallis ANOVA, <sup>2</sup> Dunn's post hoc test
